# Supplementary material for: Construction of stable core–shell imprinted Ag-(poly-o-phenylenediamine)/CoFe2O4 photocatalyst endowed with the specific recognition capability for selective photodegradation of ciprofloxacin
Source: Royal Society of Chemistry journal article supplement (doi:10.1039/c7ra09835a), 2017-01-01
Supplement: c7ra09835a1.pdf [file c7ra09835a1.pdf]

## Electronic Supplementary Information

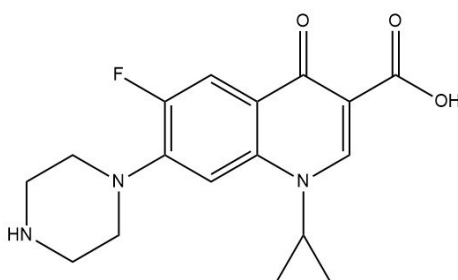

**Ciprofloxacin (CIP)**

**Fig. S1** The molecular structures of ciprofloxacin (CIP).

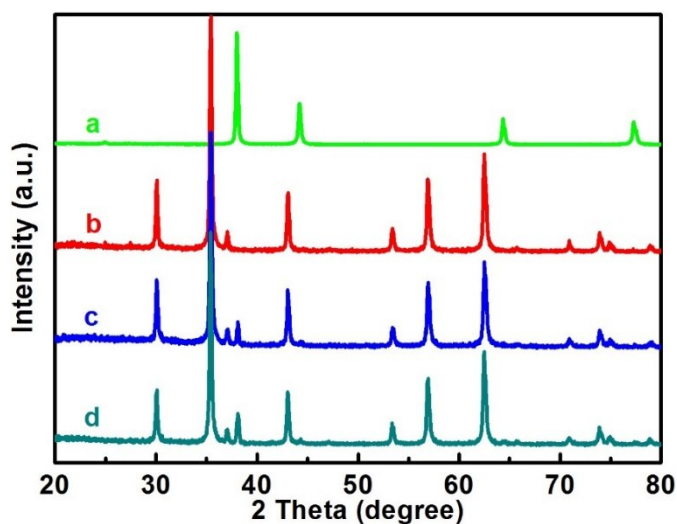

**Fig. S2** XRD patterns of different samples (a. Ag-POPD, b.  $\text{CoFe}_2\text{O}_4$ , c. imprinted Ag-POPD/ $\text{CoFe}_2\text{O}_4$  and d. non-imprinted Ag-POPD/ $\text{CoFe}_2\text{O}_4$ ).

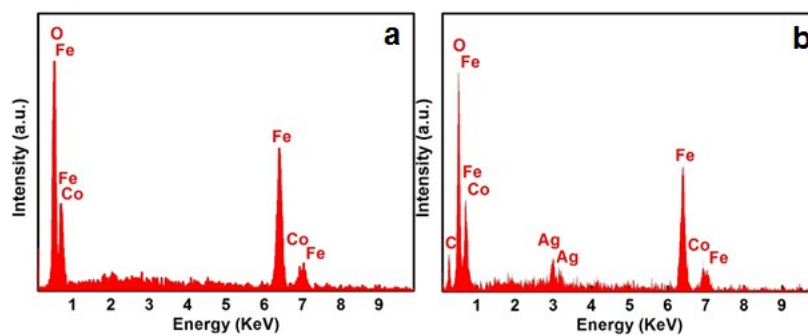

**Fig. S3** EDS spectra of  $\text{CoFe}_2\text{O}_4$  (a) and imprinted Ag-POPD/ $\text{CoFe}_2\text{O}_4$  (b).

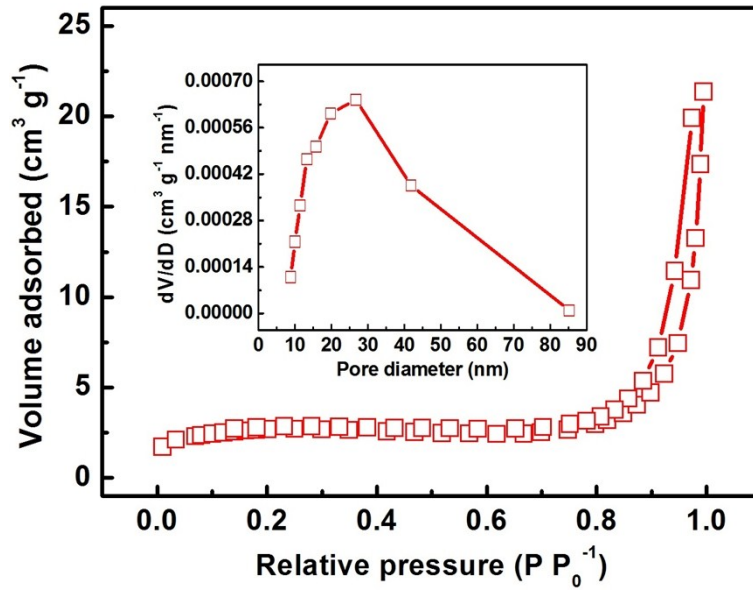

**Fig. S4** N<sub>2</sub> adsorption-desorption isotherm and corresponding pore size distribution curve (inset) of the non-imprinted Ag-POPD/CoFe<sub>2</sub>O<sub>4</sub>.

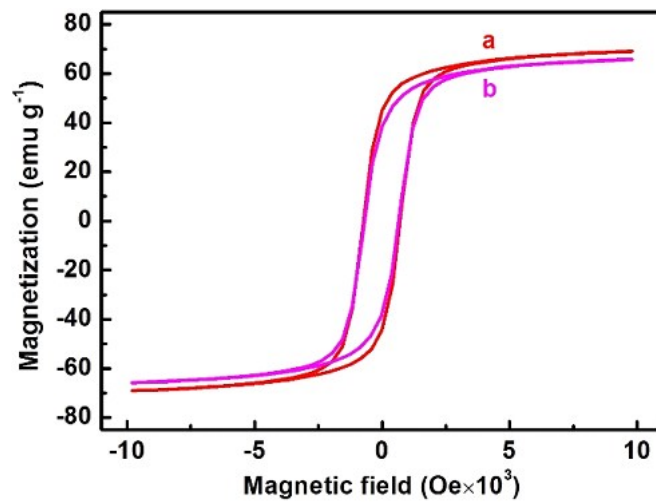

**Fig. S5** Magnetization patterns at room temperature of CoFe<sub>2</sub>O<sub>4</sub> (a) and imprinted Ag-POPD/CoFe<sub>2</sub>O<sub>4</sub> (b).

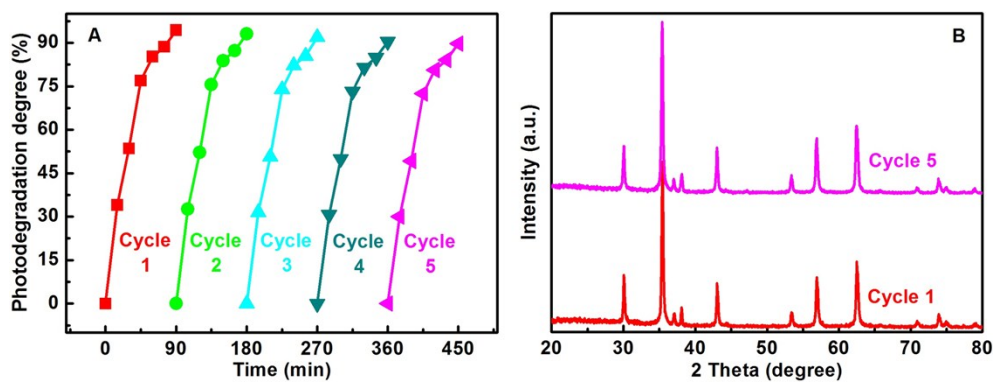

**Fig. S6** Photodegradation degrees (A) and XRD patterns (B) of the imprinted Ag-POP/CoFe<sub>2</sub>O<sub>4</sub> with different cycles.

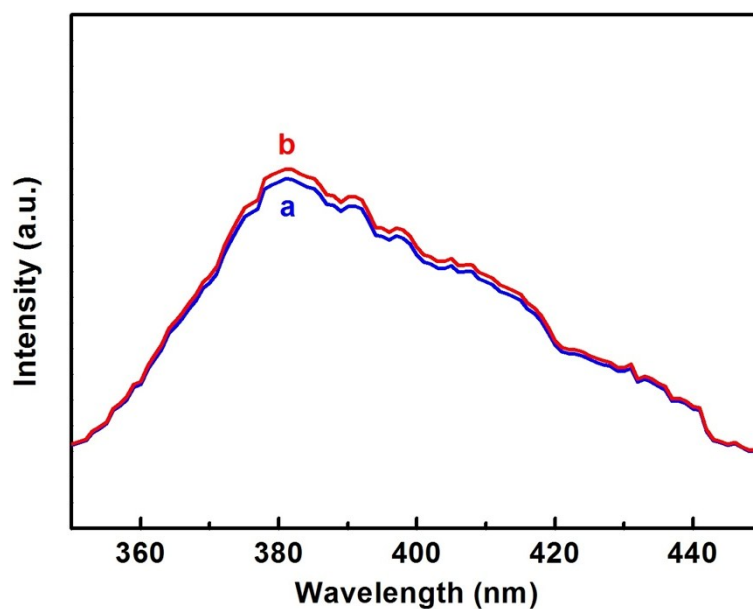

**Fig. S7** Photoluminescence (PL) spectra of imprinted Ag-POP/CoFe<sub>2</sub>O<sub>4</sub> (a) and imprinted Ag-POP/CoFe<sub>2</sub>O<sub>4</sub> after 5 cycles (b).
